# Supplementary material for: Hyperactivity of mTORC1- and mTORC2-dependent signaling mediates epilepsy downstream of somatic PTEN loss
Source: eLife. 2024 Mar 6;12:RP91323. doi: 10.7554/eLife.91323 (PMC10942640; doi:10.7554/eLife.91323)
Supplement: Figure 1—source data 1. [file elife-91323-fig1-data1.xlsx]

## Sheet: Figure 1
D1 graph data pS6
Control	Pten KO	Pten-Raptor DKO	Pten-Rictor DKO	PtRapRic TKO
203.579	231.68	150.256	204.354	167.728
201.454	253.452	166.125	260.649	186.578
189.821	337.264	188.123	315.3	168.307
163.635	253.469	181.342	226.706	161.963
181.937	271.738	164.342	222.121
184.745	218.861	157.032	193.08
200.994			201.849
186.855
196.82
D2 Graph Data pAkt
Control	Pten KO	Pten-Raptor DKO	Pten-Rictor DKO	PtRapRic TKO
159.258	158.187	203.886	149.733	138.141
161.229	193.933	183.866	135.043	141.314
147.013	174.674	169.346	153.677	157.117
143.797	165.453	160.5	148.643	155.63
146.563	180.139	207.938	146.506
143.226		156.167	140.544
145.244		160.731	135.603
149.194
C1 Graph DAPI density
Control	Pten LOF	Pten-Raptor LOF	Pten-Rictor LOF	PtRapRic LOF
52.8889	38.4444	50.7778	37.7778	52
48.8333	34.3333	42.3333	40.1667	50.4444
43.5	35.8333	49.3333	48.6667	55.1667
49.3333	43.1667	40.8333	43	52.3333
54.2222	40	51.5	44
42.75	39.3333	47.8333	38
49.6667			40.8333
51.5
C1 Graph Cre density
Control	Pten LOF	Pten-Raptor LOF	Pten-Rictor LOF	PtRapRic LOF
23.6667	10.1667	18.8333	11.8889	19.8333
23.6667	13.8333	21.3333	13.5	20.3333
17.1667	17.6667	22.1667	18	25.8333
22.6667	13.8333	18.1667	17.6667	20.5
	16.8333	23.8333	14.3333
	12.1667	19.8333	13.25
			18.6667
C1 Graph Cre/DAPI
Control	Pten LOF	Pten-Raptor LOF	Pten-Rictor LOF	PtRapRic LOF
0.447479	0.364451	0.370897	0.314706	0.38141
0.484642	0.402913	0.503937	0.3361	0.403084
0.394636	0.493023	0.449324	0.369863	0.468278
0.459459	0.320463	0.444898	0.410853	0.39172
	0.420833	0.462783	0.325758
	0.309322	0.414634	0.348684
			0.457143
Cre by location
Location	Control							Pten LOF							Pten-Rap LOF							Pten-Ric LOF							PtRapRic LOF
0.9	20	12	14	19				5	25	30	37	30	21		13	12	35	18		15		10	25	30	24	30			15			11
0.3	29	26	18	30				3	26	27	29	25	37		15	10	29	12	66	17		12	35	21	26	42	21	17	20	30	50	16
-0.5	31	30	29	31				13	21	22	45	31	34		23	16	31	20	61	18		35	30	28	31	35	40	42	23	47	71	21
-1.1	54.375	59.596	46.25	46.789				20	40.5797	22.7848	22	40	29.5775		25	54.5455	59.1398	40	34.0426	41.6667		42.5743	26.4368	29	39.4737	37.1134	42.1875	76	36.1702	66	50	41.1765
-1.6	46.875	45.5446	32.9545	40.9091				24.1071	45.7143	37.0968	26.5306	40.2597	23.8095		21	56.3218	42.3077	45.5556	44.6429	44		41.8919	31.7073	34.375	21.5909	38.6139	29.5455	44.5946	36.9748	20.4819	47.6636	40.5405
-2.1	32.6923	39.7849	39.7849	49.4949				34.3434	34.3284	57.8378	42.6667	34.6154	39.5062		29.9435	41.1111	34.3434	47.5	59.2233	38.4615		38.5542	38.9474	42.8571	41.5584	35.1064	8.69565	41.3043	41.4141	63.3094	41.3793	35.6436
-2.6	40	21	30	41				15	20	60	29.0698	50.5882			47.619	30	35	30	68	23		30	30	20.8633	30	29	17	51.8987	13	35	51.8519	38
-3.3	51	31	24	20				9	30	15	26	45			15	35	21	10		30		12	28	17	31	30			9			18

## Sheet: Figure 1 Supplement 1
dentate Cre expression
Control	Pten KO	Pten-Raptor DKO	Pten-Rictor DKO	PtRapRic TKO
11	12.5	14.5	25	10
17.5	13	22.5	9.5	9
16	8	14	13.5	9.5
21.5	14.5	9	23.5	7
15	19.5	2	4
	10	7	20
			12
dentate Cre expression vs. GS
Control		Pten LOF		Pten-Raptor LOF		Pten-Rictor LOF		PtRapRic LOF
No GS	GS	No GS	GS	No GS	GS	No GS	GS	No GS	GS
11		14.5	12.5	22.5	14.5	25	20	10
17.5		19.5	10	14	7	9.5	12	9
			13	9		13.5		9.5
			8	2		23.5		7
CA1 Cre expression
Control	Pten KO	Pten-Raptor DKO	Pten-Rictor DKO	PtRapRic TKO
14.5	18.5	11	19	14.5
13.5	16.5	19	17.5	16
16.5	4.5	22.5	19.5	18.5
25	23.5	20	22	13.5
17.5	21	12	6.5
	12	9	26.5
			16
CA1 Cre expression vs. GS
Control		Pten LOF		Pten-Raptor LOF		Pten-Rictor LOF		PtRapRic LOF
No GS	GS	No GS	GS	No GS	GS	No GS	GS	No GS	GS
14.5		23.5	18.5	19	11	19	16	14.5
13.5		21	12	22.5	9	17.5	26.5	16
			16.5	20		19.5		18.5
			4.5	12		22		13.5
						6.5
CA3 Cre expression
Control	Pten KO	Pten-Raptor DKO	Pten-Rictor DKO	PtRapRic TKO
9.5	15.5	8	15	6.5
12	5.5	17	9	10
5.5	2.5	8	5	8.5
9.5	5	6.5	10.5	7
7	7	4	1
	5	4.5	8
			11
CA3 Cre expression vs. GS
Control		Pten LOF		Pten-Raptor LOF		Pten-Rictor LOF		PtRapRic LOF
No GS	GS	No GS	GS	No GS	GS	No GS	GS	No GS	GS
9.5		5	15.5	17	8	15	8	6.5
12		7	5	8	4.5	9	11	10
			5.5	6.5		5		8.5
			2.5	4		10.5		7
						1
DG pS6
Control	Pten KO	Pten-Raptor DKO	Pten-Rictor DKO	PtRapRic TKO
672.634	716.6	679.033	619.022	571.417
623.558	960.728	587.058	594.404	487.285
625.229	875.085	780.514	776.547	566.978
780.456		590.93	968.567	594.064
		598.205	706.783
		642.757	628.551
CA1 pS6
Control	Pten KO	Pten-Raptor DKO	Pten-Rictor DKO	PtRapRic TKO
700.401	683.929	586.108	685.49	826.51
849.34	1030.91	849.835	841.011	787.633
837.863	749.187	766.565	769.559	769.928
846.989		513.82	753.424	665.777
		728.089	961.736
			726.97
DG pAkt
Control	Pten KO	Pten-Raptor DKO	Pten-Rictor DKO	PtRapRic TKO
744.344	725.279	720.633	668.059	738.821
731.169	762.261	832.445	681.214	741.658
754.73	819.51	712.116	797.479	639.922
709.555	829.094	735.797	706.206	747.561
705.541	788.873	662.066	706.018
771.787	716.555	803.687	786.735
729.059			770.453
756.929
CA1 pAkt
Control	Pten KO	Pten-Raptor DKO	Pten-Rictor DKO	PtRapRic TKO
845.564	896.644	854.64	740.367	852.258
748.909	760.319	924.419	878.349	783.242
768.41	762.457	736.684	840.316	729.095
719.135	821.801	797	794.655	654.659
746.878	771.59	707.369	721.452
787.497	854.529	791.095	736.37
802.133			687.41
843.151
DG soma size
Control	Pten KO	Pten-Raptor DKO	Pten-Rictor DKO	PtRapRic TKO
66.4985	118.773	52.0412	105.245	77.5717
75.2803	91.2344	54.8185	111.454	58.078
71.3264	123.03	85.1067	80.9298	68.3935
67.4095	141.147	73.1692	76.9695	69.7956
57.6995	75.6089		100.007
56.0396			71.6876
75.4597
66.091
55.2482
CA1 soma size
Control	Pten KO	Pten-Raptor DKO	Pten-Rictor DKO	PtRapRic TKO
101.9	141.415	84.3215	138.531	96.8175
91.1643	142.642	73.0136	144.236	69.9222
102.328	140.044	85.6799	121.888	65.4109
103.242	145.583	88.1197	86.6532	103.797
115.609	105.579		121.543
88.2134			100.548
75.9434
78.2332
71.6216
