# Supplementary material for: Hyperactivity of mTORC1- and mTORC2-dependent signaling mediates epilepsy downstream of somatic PTEN loss
Source: eLife. 2024 Mar 6;12:RP91323. doi: 10.7554/eLife.91323 (PMC10942640; doi:10.7554/eLife.91323)
Supplement: Figure 2—source data 1. [file elife-91323-fig2-data1.xlsx]

## Sheet: Sheet1
B. Mean Cortical Thickness
Control	Pten LOF	Pten-Raptor LOF	Pten-Rictor LOF	Pten-Rap-Ric LOF
1.0341	1.21059	1.01757	0.962722	1.03754
0.947089	1.13536	0.867413	0.94023	0.870511
1.02126	1.17698	0.885628	1.02538	0.866127
1.04827	1.35968	0.914393	1.11485	0.922068
	1.25207	0.949542	0.993032
	1.14525	1.0063	1.00198
			1.03617
B. Cortical Thickness by location
Location	Control							Pten LOF							Pten-Raptor LOF							Pten-Rictor LOF							PtRapRic LOF
0.7	1.25348	1.22658	1.15022	1.24936				1.37649	1.60823	1.40335	1.28737	1.32531	1.32552		1.08792	1.05299	1.0994	1.1728	1.04377	1.14268		1.05463	1.22181	1.09206	1.30214	1.14408	1.24719	1.22101	1.13356	1.02131	0.991304	1.05874
0.2	1.24636	1.17147	1.18201	1.25776				1.37366	1.60206	1.41821	1.31985	1.3784	1.26169		1.09508	1.05053	1.03661	1.1967	1.13894	1.24579		1.14757	1.1846	1.13145	1.34914	1.21586	1.05429	1.23293	1.16372	0.995137	0.989792	1.09919
-0.5	1.27655	1.17709	1.11464	1.21749				1.47388	1.59585	1.45332	1.30367	1.30903	1.24883		1.10201	1.10257	0.951909	1.11224	1.10854	1.268		1.17008	1.138	1.17954	1.16793	1.16536	1.13239	1.2189	1.16045	0.914235	0.960999	1.02483
-1.1	1.1518	1.17978	0.892166	1.09307				1.46788	1.33003	1.21757	1.33092	1.23702	1.11041		0.874332	0.936319	0.880189	1.03542	0.997475	1.11111		1.15161	1.0133	0.998466	1.07978	0.924991	1.03161	1.02109	0.999345	0.766929	0.950009	0.942293
-1.6	1.02234	1.01404	0.955294	1.00649				1.32785	1.26968	1.06147	1.08318	1.19541	0.893893		0.773186	0.747681	0.711879	0.973805	1.05476	0.877058		0.981062	0.790134	0.904521	0.919847	0.951412	0.888281	0.920782	0.903713	0.732323	0.932941	0.850636
-2.1	0.850615	0.784073	0.718459	0.938201				1.07606	1.1594	0.959137	0.958028	1.06679	0.873317		0.830403	0.725058	0.712099	0.864078	0.821409	0.86069		0.961684	0.714423	0.799614	0.899037	0.795922	0.874719	0.841751	0.847596	0.808782	0.760615	0.691171
-2.7	0.788247	0.815235	0.743773	0.709665				1.00017	1.12855	0.972186	0.883605	1.05416			0.742326	0.752255	0.741128	0.861126		0.843855		0.910563	0.737615	0.818091			0.786569	0.893425			0.685092	0.780958
-3.3	0.796788	0.801797	0.820161	0.800725				0.920553	1.18363	0.930577	0.91628	1.11857			0.809881	0.717617	0.806089	0.924401		0.885007		0.825812	0.721963	0.778036			0.772073	0.851571			0.734428	0.737
C. Mean Soma Size
Control	Pten LOF	Pten-Raptor LOF	Pten-Rictor LOF	PtRapRic LOF
114.775	282.845	133.478	167.501	113.258
111.671	224.964	117.31	162.679	121.755
122.814	222.548	110.763	158.296	114.404
125.929	187.242	125.347	147.703	117.417
91.9345	235.772	129.835	154.859
105.003	185.96	118.576	172.896
107.609			156.084
93.5545
104.547
C. Cumulative soma size (Raw vakues used to make cumulative plot)
Control	Pten LOF	Pten-Raptor LOF	Pten-Rictor LOF	PtRapRic LOF
118.845	153.287	87.8089	186.215	119.98
134.741	250.558	121.494	183.945	118.466
161.235	210.06	104.084	187.729	135.877
95.3787	251.315	120.737	177.132	82.8886
144.203	243.745	107.869	196.813	88.9444
171.076	231.634	111.275	159.343	112.032
95.0002	340.638	104.841	341.017	100.677
114.303	311.873	107.112	169.562	136.634
130.199	202.49	107.49	201.355	125.279
104.084	318.307	109.383	168.805	117.709
121.873	294.463	97.6496	200.219	135.877
155.558	300.518	98.4065	153.287	129.064
120.737	320.578	98.785	152.152	130.199
81.3746	189.243	122.251	173.725	143.446
126.415	205.14	109.004	204.004	98.4065
92.7292	265.698	88.9444	197.57	121.494
102.191	251.694	107.49	147.231	80.9962
109.761	310.738	110.14	227.849	90.4583
99.542	189.243	87.4304	173.725	103.327
134.363	242.988	124.144	115.438	109.761
104.084	302.789	112.789	166.156	129.064
93.1077	344.423	85.1595	153.666	119.98
107.869	328.148	102.57	158.586	108.247
126.415	378.108	86.6735	125.279	98.785
105.598	465.539	159.721	132.849	131.713
123.765	184.323	126.415	119.223	112.032
111.654	195.299	99.1635	170.698	187.351
98.0281	397.411	105.598	120.359	125.658
111.654	311.495	114.303	159.721	125.658
98.4065	243.367	124.144	140.04	136.634
113.546	400.439	90.4583	137.391	158.207
111.275	280.08	137.012	122.251	102.57
114.681	268.347	164.263	73.4264	131.713
123.387	386.056	123.387	123.387	116.195
135.498	265.319	109.004	119.98	133.984
105.598	288.785	146.474	125.658	103.705
98.0281	211.574	99.9205	144.96	107.49
173.725	178.646	104.841	185.08	106.355
130.956	191.893	116.195	154.044	121.494
140.797	199.462	123.008	205.14	102.57
121.116	145.339	90.8368	122.251	137.012
154.801	169.941	90.4583	134.741	153.666
151.773	167.291	149.124	128.685	101.434
140.04	198.706	143.825	141.554	123.765
151.016	241.096	134.363	118.466	153.666
130.199	224.821	148.745	143.446	164.263
137.012	179.024	143.825	182.809	147.988
113.168	150.638	119.98	179.024	109.004
136.634	209.303	124.901	174.861	98.4065
149.502	166.913	155.18	177.889	139.283
127.55	193.028	116.574	149.881	147.231
143.068	144.96	116.195	137.769	118.088
129.442	189.622	162.371	205.897	99.542
157.45	228.227	147.61	141.554	207.789
164.263	205.897	121.873	137.012	92.7292
112.032	211.196	133.606	174.861	84.4025
159.721	166.534	144.203	147.231	87.0519
106.355	259.263	137.012	185.837	97.2711
109.383	166.913	138.148	207.789	82.1316
116.574	225.957	103.705	289.921	91.9723
99.542	200.219	152.53	155.937	102.948
77.9683	186.594	112.032	141.176	86.6735
126.793	266.455	123.765	266.076	85.538
110.518	207.411	132.849	127.929	66.9921
118.088	172.59	141.933	200.219	93.4862
108.626	237.311	61.6933	104.462	88.9444
125.279	171.454	57.1515	130.578	68.8846
101.813	161.992	135.12	197.192	66.2352
129.442	217.63	154.423	149.502	77.2113
116.574	300.518	175.618	204.383	102.57
141.176	281.594	150.259	109.761	95.7571
98.785	225.578	96.8926	176.753	111.275
153.666	187.729	124.144	154.423	83.6456
132.47	179.403	113.168	143.825	74.9404
157.072	184.323	114.303	162.371	108.626
142.311	223.686	96.5141	75.3189	151.395
131.713	164.642	109.383	122.63	196.813
130.956	151.016	92.3508	199.462	103.705
116.574	280.08	97.6496	135.877	133.984
99.1635	205.518	100.299	147.231	117.331
116.952	250.937	99.1635	194.164	177.51
91.2153	251.315	133.984	146.096	180.917
103.327	226.335	124.522	144.203	98.0281
122.63	241.475	114.303	84.024	127.172
103.327	182.431	126.036	106.355	102.191
85.538	259.642	138.905	126.036	113.168
116.574	224.443	113.168	169.941	146.096
103.327	245.259	113.168	143.825	128.685
121.873	287.65	133.984	175.996	128.685
114.681	258.128	85.1595	179.403	129.064
93.4862	191.893	130.956	162.371	147.231
104.462	345.558	114.303	114.681	140.419
127.929	298.248	107.869	112.032	107.112
127.55	303.546	103.327	128.685	106.355
110.14	269.104	109.761	156.315	112.789
80.6177	288.028	99.1635	144.582	128.685
100.677	219.522	103.705	185.458	101.434
113.924	262.291	119.223	140.04	121.116
116.574	286.514	94.6217	133.227	155.937
100.299	264.184	129.064	154.423	148.367
127.55	190.379	132.092	159.721	142.311
137.012	193.785	136.634	179.781	131.335
99.9205	242.61	108.626	196.435	119.98
119.223	220.658	119.223	96.1356	115.817
113.546	370.538	116.952	113.546	111.654
91.9723	235.419	94.2432	85.9165	131.335
93.1077	227.849	127.55	122.251	116.952
88.5659	249.423	100.299	134.363	156.315
77.2113	239.582	86.295	97.2711	104.462
110.897	214.223	91.2153	120.737	204.004
104.084	283.487	103.327	126.036	113.168
105.598	154.801	122.251	147.988	115.06
116.574	257.371	109.383	177.51	139.662
119.602	219.901	127.172	174.861	126.415
82.5101	224.064	140.419	195.678	109.761
95.7571	299.383	114.681	275.538	99.164
98.4065	294.084	108.247	258.506	124.144
116.952	205.518	125.658	173.725	116.952
113.168	246.016	79.4822	222.55	107.49
93.1077	211.953	129.064	147.61	138.526
99.9205	221.793	145.339	140.419	103.705
94.6217	214.602	134.363	173.725	135.877
100.299	236.933	84.024	145.717	102.57
96.8926	221.415	93.1077	221.036	121.116
110.518	133.984	142.311	180.917	91.972
98.785	278.566	159.343	150.259	145.717
110.14	313.387	84.024	180.917	88.566
115.438	292.192	151.773	97.2711	95.379
102.191	306.953	104.084	220.279	102.191
117.331	299.761	113.168	207.789	91.972
100.299	224.443	95.3787	240.718	117.709
84.024	288.407	98.0281	188.486	107.112
102.948	219.522	118.088	227.092	115.06
140.04	325.12	124.522	223.686	99.542
89.3229	216.116	103.705	227.092	112.789
162.371	273.267	152.53	168.427	107.869
151.773	228.227	158.207	247.152	98.407
152.909	221.415	113.546	223.307	141.554
102.948	163.506	135.877	147.988	115.438
88.9444	296.734	154.423	152.53	95.379
71.1555	218.008	175.618	146.474	158.586
75.6973	313.009	144.582	127.929	113.546
138.905	312.252	110.518	155.937	126.036
140.419	325.877	141.933	131.713	134.741
80.6177	264.941	141.176	109.383	112.411
109.004	236.554	121.494	195.299	124.522
103.327	220.658	178.267	151.016	119.98
110.897	278.566	99.1635	180.538	116.195
156.693	281.216	85.9165	156.315	161.992
103.327	332.69	111.275	152.152	104.084
114.681	257.749	101.434	118.845	112.032
105.976	215.737	110.14	140.419	128.685
132.092	268.726	116.574	119.223	140.419
126.036	288.028	107.112	219.144	151.016
89.7014	264.941	123.387	164.263	136.255
127.55	279.702	144.203	188.865	90.458
140.797	340.638	110.14	130.578	173.725
116.195	127.55	94.6217	172.968	180.16
62.4503	85.538	163.128	129.442	132.47
87.4304	232.012	167.291	91.9723	116.952
125.279	221.415	178.646	133.984	157.829
79.4822	194.921	135.877	135.877	241.853
76.0758	335.718	155.937	185.837	137.391
77.5898	299.761	112.032	126.036	136.634
90.4583	211.196	138.905	147.988	179.781
89.7014	155.937	144.96	143.825	165.02
81.7531	199.084	162.371	167.291	103.705
87.4304	256.614	112.411	187.729	104.841
93.4862	184.702	137.012	134.741	101.056
135.12	235.04	176.375	66.6137	104.084
124.144	256.992	177.51	130.578	104.841
138.526	171.076	114.303	302.411	131.335
135.12	245.259	182.431	222.55	117.709
107.49	194.921	228.227	73.0479	124.144
111.275	186.594	127.929	239.582	152.909
129.064	250.18	144.582	81.3746	101.056
111.654	244.124	77.2113	190	123.008
113.168	227.471	131.713	285	108.247
133.227	280.459	138.526	214.98	183.945
127.172	307.331	106.733	196.056	146.096
118.088	274.781	90.0798	202.49	148.367
132.47	231.634	122.251	205.897	157.45
101.434	201.733	102.948	127.929	179.781
105.598	211.953	97.6496	171.076	129.442
126.036	225.578	99.1635	188.108	150.638
135.12	263.805	126.036	214.223
124.144	185.458	74.5619	168.805
99.9205	276.674	133.227	163.506
119.223	125.279	71.534	168.048
112.032	147.61	99.1635	235.797
116.195	209.682	144.203	166.913
107.112	213.467	164.263	228.606
119.98	163.506	151.773	260.399
119.98	161.235	108.626	186.594
119.602	128.685	118.088	242.61
178.646	154.423	108.247	183.566
100.677	165.02	136.255	235.04
116.574	224.064	121.494	116.574
137.769	130.199	91.2153	124.522
144.203	182.809	91.2153	145.339
126.415	208.546	59.4224	147.231
172.968	193.785	187.351	131.713
113.546	162.371	167.67	136.255
151.016	125.658	142.311	131.335
140.419	141.176	174.104	143.068
137.391	197.192	238.447	160.1
142.689	147.988	121.494	153.666
174.861	147.61	151.773	143.825
196.813	122.63	255.857	190
144.203	148.745	174.482	199.084
143.068	164.263	163.506	141.933
168.805	126.036	144.203	165.02
83.2671	125.279	180.538	109.761
97.6496	225.578	182.431	127.55
94.2432	109.383	236.554	154.423
74.1834	200.219	91.215	177.51
90.4583	140.04	218.765	182.431
143.068	120.359	166.534	148.367
99.1635	202.869	187.351	255.857
115.06	142.689	174.861	192.271
87.8089	208.168	154.044	98.028
79.1037	108.626	175.618	145.717
91.5938	155.558	114.303	109.761
102.57	239.961	150.259	149.124
129.064	151.395	186.215	132.092
104.841	192.271	166.913	119.223
125.658	168.048	171.076	129.442
78.3467	99.9205	165.02	146.853
81.7531	202.112	151.395	152.53
102.57	96.1356	224.821	146.853
114.681	145.339	187.351	126.036
92.7292	225.2	193.785	151.016
88.9444	185.08	152.909	158.207
121.873	121.494	153.287	142.689
85.538	211.574	178.267	258.128
80.9962	213.467	187.729	152.53
89.7014	169.941	193.407	207.032
148.745	147.61	176.375	263.427
113.546	228.227	207.032	162.749
145.339	123.387	168.805	177.51
139.662	156.315	149.124	233.526
108.247	232.769	161.992	207.411
130.956	158.207	190	138.148
120.359	292.949	145.339	153.287
142.311	186.972	120.359	144.582
84.024	247.152	116.574	120.737
108.626	247.152	190	104.084
96.1356	278.945	119.602	136.255
97.6496	275.16	113.168	142.311
109.383	156.315	165.777	129.821
105.219	208.925	116.195	110.518
124.522	331.176	102.948	208.546
137.769	196.813	134.363	195.299
137.012	274.781	119.223	137.012
109.383	243.367	111.275	210.439
115.438	171.076	179.024	122.63
106.355	241.475	140.797	123.765
118.466	221.793	179.403	131.335
122.251	250.937	99.9205	142.311
112.411	225.578	141.933	99.164
130.578	283.108	146.474	137.769
131.335	184.702	105.976	194.164
141.176	260.777	110.518	147.988
130.956	249.044	87.0519	122.251
128.307	194.921	114.681	179.781
133.227	121.494	119.223	133.227
105.219	197.57	119.98	174.482
131.713	172.59	85.1595	230.877
127.55	238.447	113.924	158.586
	275.917	116.952	203.247
	194.542	125.658	174.482
	213.088	123.765	128.307
	254.722	113.168	174.482
	166.156	99.542	175.618
	233.905	141.176	175.618
	206.654	118.466	194.164
	140.419	132.47	207.032
	183.945	131.713	175.996
	162.749	123.765	177.889
	154.423	170.319	167.67
	172.59	126.415	202.49
	107.112	105.598	88.5659
	164.263	153.287	151.773
	191.514	141.176	114.303
	139.283	143.068	135.877
	181.674	146.096	111.275
	191.893	153.666	73.8049
	189.622	131.713	132.47
	243.367	124.144	161.992
	152.909	149.124	149.124
	174.861	130.956	166.156
	126.036	165.399	183.566
	156.315	103.327	169.562
	165.777	119.602	131.335
	171.076	132.092	147.61
	201.355	134.363	186.594
	160.478	110.14	189.243
	148.745	136.255	134.363
	155.558	126.036	175.618
	163.128	158.586	208.168
	219.522	134.741	132.47
	132.47	124.901	227.092
	117.331	152.152	190.757
	112.411	154.423	175.239
			196.813
			156.693
			182.052
			197.192
			209.303
			199.084
			237.69
			176.375
			175.239
			179.403
			86.6735
			123.765
			154.423
			109.383
			130.956
			149.881
			116.195
			119.602
			103.705
			149.502
			105.976
			97.2711
			107.869
			144.582
			244.502
			141.176
			165.399
			126.415
			129.821
			145.717
			114.303
			71.9125
			164.642
			138.526
			122.251
			196.813
			142.689
			117.331
			132.092
			127.172
			150.259
			113.924
			117.331
			193.028
			136.634
			110.14
			161.235
			168.048
			136.634
			151.773
			127.55
			112.032
			111.275
			126.415
			127.929
			166.156
			138.905
			106.355
			123.387
			161.992
			131.335
			109.383
			118.466
			205.897
			223.686
			177.889
			148.745
			100.677
			184.702
			91.5938
			99.542
D. Resistance
Pten LOF	Pten-Raptor LOF	Pten-Rictpr LOF	PtRapRic LOF	Control
0.385989	0.590659	0.545874	1.01902	0.767663
0.503663	2.03755	0.888632	0.523098	0.889946
0.494505	1.11264	1.12522	0.449728	0.699728
0.356685	1.14011	0.767455	0.971467	0.496603
0.966117	0.84707	1.07905	0.529891	1.25
0.322344	0.732601	1.16561	0.597826	0.985054
0.709707	0.750916	1.206		1.18886
0.228938	2.00549	1.59261	1.10734	1.32473
0.447802	0.975275	3.26024	1.31114	0.794837
0.503663	0.860806	0.657819	0.733696	1.4606
0.888278	1.96429	1.06751	2.6019	1.19565
0.185897	0.599817	0.721293	1.31793	0.822011
0.549451	0.595238	0.456434	0.438859	0.835598
0.604396	3.20055	1.13676	0.46875	0.930707
0.47619	0.576923	0.871321	0.588995	0.575408
0.237179	0.618132	0.946336	0.699728	1.33832
0.77381	0.869963	1.04443	0.382473	0.80163
0.347952	1.43315	0.940565	0.587636	1.58288
0.413156	0.327839	0.703982	0.842391	0.91712
0.547028	0.429029	1.20023	1.24321	0.747283
1.03289	0.480769	1.10791	1.61685	1.15489
0.663589	0.801282	0.998269	1.44022	1.46739
0.640508	1.0119	0.321985	0.835598	1.18886
1.03289		0.594345	0.774457	0.815217
0.934795		0.755915	0.588995	0.76087
0.744374		0.417196	1.67799
0.283901		0.56607	1.22283
0.386613		0.871321	0.80163
0.338142			0.930707
0.462204			0.876359
			1.05978
			1.33152
			0.815217
Capacitance
Pten LOF	Pten-Raptor LOF	Pten-Rictor LOF	PtRapRic LOF	Control
1.67894	1.14741	0.902422	0.914339	0.614545
1.47787	0.672077	0.710363	0.700616	0.609891
1.65344	1.27757	0.46911	1.21936	0.927573
1.71839	0.951956	0.974416	2.14662	0.782773
1.44876	1.27914	0.674012	0.980884	1.40726
1.44901	0.874669	0.765499	2.32828	0.946675
1.47551	0.999322	0.608523	0.976866	0.934421
5.45767	0.97636	0.798804	2.5954	0.691656
2.69419	0.999826	0.334977	1.20936	0.815454
1.03463	1.15319	0.346756	1.08337	0.613655
1.30639	0.972176	0.717577	0.638705	1.49471
4.87724	1.44291	1.11248	0.545349	0.893636
0.957892	1.06431	1.68846	0.459539	1.28714
2.35089	0.638478	0.408476	0.324519	1.49912
2.48397	1.42458	0.515578	0.942899	1.14373
4.22616	1.32667	1.68154	1.68191	1.30142
1.43233	1.50376	0.911417	0.66138	1.04931
1.26437	1.24457	0.631202	0.810869	1.30519
1.29167	2.6141	0.52591	1.92359	0.460513
1.13131	1.23135	0.93992	0.59281	0.887847
0.488921	1.57974	0.477838	0.738588	1.33456
1.84418	0.535903	1.29185	0.798881	1.09268
0.800532	1.30839	2.08198	0.96303	0.302659
0.314199		0.441129	0.293913	0.34741
1.68075		0.742866	1.06822	0.481273
0.635763		1.73308	2.06786	0.245552
1.7597		0.812758	0.32006	0.508705
1.96734		1.38584	0.89455	0.821709
2.08329			1.61449	1.24385
1.09343			1.61076	2.72887
			2.62038	0.742676
			1.17507	0.193494
				1.58839
				1.43321
				0.823066
				1.33807
				1.72718
				1.38298
Rheobase
Pten LOF	Pten-Raptor LOF	Pten-Rictor LOF	PtRapRic LOF	Control
1.42936	1.42936	1.17936	1.19474	1.97911
1.75921	0.329852	1.57248	1.34409	0.219901
0.879604	0.549753	0.687961	0.896057	0.989555
1.75921	0.659703	0.786241	0.448029	0.549753
0.549753	0.879604	0.687961	1.19474	0.879604
2.74876	0.439802	0.786241	1.49343	0.659703
1.42936	0.769654	0.786241		0.549753
2.63881	0.219901	0.29484	1.49343	0.989555
1.53931	0.879604	0.19656	1.0454	1.20946
0.989555	1.31941	0.786241	1.79211	0.219901
0.549753	0.329852	0.982801	0.298686	0.769654
2.41891	0.769654	1.08108	0.149343	0.549753
0.769654	1.42936	1.17936	1.34409	1.97911
2.30896	0.109951	0.4914	0.597372	1.20946
1.42936	0.659703	0.786241	1.64277	1.31941
1.97911	1.09951	0.4914	2.24014	1.20946
0.989555	0.549753	0.589681	1.34409	0.549753
1.76904	0.659703	0.589681	1.49343	0.769654
1.86732	1.31941	0.982801	0.298686	1.31941
1.9656	1.09951	0.687961	0.597372	1.86916
0.884521	0.879604	0.884521	0.896057	1.20946
1.08108	0.769654	0.4914	0.149343	1.37592
1.37592	0.329852	1.4742	1.0454	0.29484
0.884521		1.37592	1.79211	0.786241
0.786241		0.786241	0.896057	0.4914
1.37592		1.08108	0.597372	1.17936
1.4742		1.08108	3.1362	0.786241
2.06388		0.786241	2.53883	0.687961
2.06388			1.34409	1.08108
1.76904			2.24014	2.55528
			0.896057	0.589681
			0.597372	0.4914
			0.597372	1.57248
				2.16216
				0.39312
				1.17936
				0.884521
				0.4914
				0.746714
				0.896057
				2.53883
sEPSC Frequency
Pten LOF	Pten-Rap LOF	Pten-Ric LOF	PtRapRic	Control
3.38047	3.75494	2.22183	1.26793	1.27801
2.20671	0.624326	2.30533	0.515195	1.26303
2.12223	1.24326	1.06036		0.654284
0.723787		1.89889	1.39198	0.699221
	2.52666	1.00201	1.5799	1.64769
0.748951	0.534452	0.662475	1.04238	3.12043
	2.40144	2.8838	0.628902	0.254643
0.549431		0.712777	3.30618	1.36309
1.22349	1.17855		0.968162	0.669263
1.0737	3.18574	0.896881	3.8437	1.47813
	0.753745	1.75654	0.639239	0.424206
2.0719	0.868784	0.87173	1.48853	0.534452
0.56441		2.07897	1.0337	0.269623
0.738766	0.753745	0.163481	0.392805	0.344518
1.52163	2.32654		0.999173	1.4839
1.03521	2.75135	1.09406	0.365309	0.477867
1.39185	1.76753	0.326962	0.246434	0.549296
1.11922	2.56141	0.53672		0.821429
1.26157	1.77771	0.264085		1.86972
1.71026	1.1432		0.930329	1.0664
	3.4302	1.51308	0.697747	1.69769
	1.5027	1.10262	3.06326	0.729376
1.97435		0.737928	0.248088	1.24095
		0.389839	0.902832	0.264085
		1.63078	0.894149	0.704225
				1.00604
		0.729376	0.39632	1.34155
				1.09004
			0.31011	0.657948
				3.50589
				1.15092
				1.49018
				1.25925
				0.527186
				0.692578
				0.525532
				1.31797
				0.792433
				0.825305
				1.21811
				0.880298
				0.751085
				0.506512
				0.606368
				1.09737
sEPSC amplitude
Pten LOF	Pten-Raptor LOF	Pten-Rictor LOF	PtRapRic LOF	Control
1.57511	0.743549	0.652514	1.37199	1.3416
0.506079			1.31496	1.51034
0.651444	0.785883	1.40289	0.728771	0.689475
0.540016	1.25972		1.14544	0.560699
0.743202	1.2161	0.764567	1.37833	1.74784
1.75943	1.89608	1.11387	1.109	1.09129
1.13637			1.42586	0.820553
	1.93317	1.57858	1.85837	0.85576
1.23765	0.634942			0.72341
0.506603	0.863782	0.768205	1.60646	0.978901
0.902192	0.607592	1.66892	1.20406	0.610005
1.22201	1.60521	1.84185	1.25317	1.2399
0.653253	0.5819	1.67227		0.954373
		1.06813	1.01394	1.17909
0.976287	1.56628		1.34664	0.460251
1.34851	1.35184	1.19333	1.02978	0.817474
1.58801	1.6476			1.41379
1.7736	0.739675	0.583379	0.934728	0.766667
0.950605	0.606746	1.38342		1.32536
0.821879	0.550355	1.37595		0.712486
			1.09316	0.886667
0.63578	0.819471	1.15957	0.819075	1.62302
0.497628	1.50487			0.854191
		1.26048		0.873441
0.502468		1.60261		1.48382
1.86387			0.731939	0.685595
1.44667		1.39339	0.931559	0.787925
		1.49799	0.982256	1.18821
1.66459			0.741445	1.1391
0.609733			0.988593	0.747782
			0.728771	1.29911
				0.792142
			0.823828	0.83967
				1.20406
				0.776299
				0.825305
				0.904626
				1.08207
				0.785805
				0.95057
				1.07731
				1.34664
				0.570342
				1.22782
				1.06939
				1.00402
