# Supplementary material for: Hyperactivity of mTORC1- and mTORC2-dependent signaling mediates epilepsy downstream of somatic PTEN loss
Source: eLife. 2024 Mar 6;12:RP91323. doi: 10.7554/eLife.91323 (PMC10942640; doi:10.7554/eLife.91323)
Supplement: Figure 3—source data 1. [file elife-91323-fig3-data1.xlsx]

## Sheet: Sheet1
C. Seizures/day
Control	Pten LOF	Pten-Raptor LOF	Pten-Rictor LOF	PtRapRic LOF
0	0.402375	0	0.452538	0
0	0.815146	1.26208	0	0
0	0	0.299576	0	0
0	1.55103	0	0	0
0	0.51922	0	0.539326	0
0	0	0	0	0
0	0		0
0
0
Seizure length
Control	Pten LOF	Pten-Raptor LOF	Pten-Rictor LOF	PtRapRic LOF
0	25.8287	49.9911	35.5492	0
	26.6619	91.1296	32.2165
	30.5501	78.8054	37.7711
	22.77	38.6042	34.4383
	22.77	66.3771	44.992
	33.6051	70.8207	48.8802
	35.827	83.0408	36.1047
	26.6619	77.2085	26.1065
	27.7728	71.0985	26.1065
	23.3292	47.7693	25.2733
	28.3283	53.0461	24.1624
	23.3292	87.7622
	23.6069	44.1588
	19.441	88.0399
	18.3301	75.2644
	19.7187	29.9947
	26.3842	23.3292
	41.937	48.8802
	34.9938	91.9281
	38.0488
	35.827
	37.2156
	36.9379
	32.772
	38.6042
	33.3274
	35.827
	49.9911
	57.4898
	31.9388
	73.0426
	42.7702
	37.2156
	49.9911
	88.0399
	69.1544
	46.6584
	38.3265
	43.6034
	31.9388
	31.94
	44.992
	35.5492
	18.6078
	23.3292
	33.6051
	28.3283
	28.0506
D. SWD rate
Control	Pten LOF	Pten-Raptor LOF	Pten-Rictor LOF	PtRapRic LOF
0	11.6875	11.125	4.1875	0.625
0	16.125	10.6875	3.0625	0
0	10.1875	11	8.625	0.875
0.5	4.0625	10.75	7.5	1.875
0	11.1875	7.41667	5.75	0
1.125	12.4375	5.5	7.5	0
1	7.96429		10
0
0
