# Supplementary material for: Hyperactivity of mTORC1- and mTORC2-dependent signaling mediates epilepsy downstream of somatic PTEN loss
Source: eLife. 2024 Mar 6;12:RP91323. doi: 10.7554/eLife.91323 (PMC10942640; doi:10.7554/eLife.91323)
Supplement: Figure 4—source data 1. [file elife-91323-fig4-data1.xlsx]

## Sheet: Sheet1
C. Coastline
Control	Pten LOF	Pten-Raptor LOF	Pten-Rictor LOF	Pt-Rap-Ric LOF
263470970	441274589	430239567	396531055	248031446
325060263	713970093	339168111	361796738	305371395
352257618	410189788	291726110	399711098	294781369
221952316	394682538	358665356	279844347	258015673
221330805	354734221	329026064	396084462	231017375
222762490	479676200	317645166	343782267	307034279
271409543	360113661		506272250
206570104
186676944
C. Mean EEG amp.
Control	Pten LOF	Pten-Raptor LOF	Pten-Rictor LOF	Pt-Rap-Ric LOF
33.2457	45.0777	43.1074	48.353	36.8004
28.9903	50.4426	41.8552	42.8659	25.2719
46.0292	88.2472	60.8292	40.722	45.2019
29.5234	57.608	47.4435	63.3285	32.5592
37.6061	51.8489	43.6686	53.4569	38.0531
24.7469	44.4981	52.211	35.7221	39.9308
24.609	61.971		50.4411
34.6794
43.5092
C. Total Power
155062	205458	295600	191570	114575
87529.7	485988	175127	142304	47830.7
60663.2	291316	143223	212813	148357
63355.8	242111	227871	106986	93926.5
104847	156416	190947	224826	110326
47790.3	328909	135005	150173	103038
49736.5	182290		363782
90285
139625
B. Total Power by Frequency
	Control										Pten LOF										Pten-Raptor LOF										Pten-Rictor LOF										PtRapRic LOF
1	2259.1	3639.64	4433.96	2018.68	2447.57	9812.27	3287.94	1103.83	6175.04		4696.74	3637.02	4928.34	5370.93	2119.73	8876.47	9714.67				2841.85	3795.47	3935.1	4354.11	8329.99	1701.99					8479.34	1481.12	4100.32	3255.07	7615.97	1364.3					1444.84	1502.8	2483.25	4101.21	1450.67	4359.44
2	6545.57	3653.86	6173.17	2947.32	3090.55	6314.54	3055.67	3034.98	8988.15		5705.54	10625.2	11552.2	17112.4	4050.33	18921.1	16320.9				7022.25	4875.08	4299.68	7354.84	42238.6	3274.3					7846.35	2905.74	6276.23	4906.11	12771.9	4131.29					3423.86	1293.46	6749.27	3805.38	3246.57	3581.5
3	11943.4	4923.57	8136.14	3813.03	4251.57	6807.72	4051.31	6814.35	10709.2		8526.51	24061.9	18117.8	13434.1	6635.7	20761.3	14980.6				14061.6	7989.85	6024.16	12407.9	17353.1	6258.29					10803.2	5418.27	9564.69	7679.46	21097.1	9300.24					8285.29	1790.92	11611.2	4467.02	5911.3	5046.85
4	15326.3	6145.42	9819.39	4287.42	4307	10012.1	4799.7	9960.63	13723.1		12424.1	38424.5	29654.5	17526.4	9691.29	23397.6	13236.7				22971.6	14345.1	11203.4	17653.9	9798.89	9654.98					15825.8	8103.15	14481	10512.9	27652.3	14566.8					12986	2283.61	14249.4	5683.15	8255.58	7543.83
5	14912.2	5919.45	9662.19	3984.94	4191.52	9558.06	4953.08	10311.8	14562.6		14171.7	42291.7	37143	20735.9	11699.6	29146.6	13112.4				27284.2	18249.6	15847.2	22258	10116.2	11487.2					15365.2	9360.98	17137.4	10871	27907.2	16778.4					14625.5	2637.5	15888.8	6756.8	9388	8413.17
6	14121	5414.81	9285.17	3535.52	3741.71	7598.09	4660.67	8776.55	12729.2		14518.7	38304.7	32032.1	19633.7	11959	33035.2	12786.4				29693.2	17611.2	15926.9	23491.3	10521.2	11981.5					14918.3	9623.12	18262.6	10090.9	27625.5	16400.5					12798.1	3066.53	16435.9	8336.04	9532.76	8643.09
7	13490.8	4722.03	8695.59	3184.51	3530.6	5637.19	4421.11	7321.92	10249.2		12514.6	33978.6	21761.5	16218.9	12335.4	26622.1	12067.6				31616.6	16454.7	15121.7	21310.5	10721.1	11493.6					15494.3	8923.24	17680	9032.93	25220.4	15530.7					9905.41	3418.08	14788.6	10548.9	9048.63	8376.5
8	12155	4020.93	7573.52	2928.91	3201.24	4448.64	4473.47	6104.24	8297.58		10716.2	27330.6	15599.3	13201.8	10929.7	18516.7	10706.9				26004.2	13519	12377.4	17714.1	9922.37	9735.58					15711.9	7450.25	16004.7	7887.83	21351.4	13459.6					7682.21	3264.8	11503.9	9532.32	8591.05	7558.62
9	10718.8	3361.76	6505.06	2550.91	2748.58	3564.71	4036.08	4986.54	6643		9702.49	21618	12950.4	11077	8960.27	14503.6	8645.62				19023.2	10353.2	8878.34	14254.5	8107.42	8049.99					14404.3	6046.95	14193.5	6846.13	18357.5	11524					6119.57	2801.36	8379.68	6399.64	7199.89	6408.53
10	8423.11	2777.89	5212.49	2119.44	2268.96	2957.29	3119.69	3911.48	5295.74		8712.57	18146.9	11306.8	9664.75	7705.57	12567.6	7004.23				14635.3	8281.17	6490.94	11385.7	6648.03	6919.03					11322.8	5050.13	12395.1	6323.93	15681.2	9469.53					4892.16	2348.36	6034.11	4237.42	5749.18	5190.5
11	6179.28	2217.3	3780.63	1715.62	1791.42	2514.93	2402.4	3149.25	4430.65		7999.93	16790.7	9786.86	8754	6613.98	11428.1	6150.7				12211.4	6774.12	5191.88	9388.79	5686.62	6028.83					9529.03	4492.75	10832.7	6301.97	13431.5	7972.82					4090.53	1961.84	4623.07	3435.48	4646.77	4237.71
12	4679.26	1833.14	2965.54	1407.84	1488.08	2091	1922.13	2630.3	3830.6		7430.38	16145.6	8485.04	7919.05	5928.11	10032.6	5737.35				10805.6	5643.53	4639.58	8361.64	5054.8	5476.21					8413.04	4113.6	9671.79	6479.61	11833.7	6964.13					3474.82	1719.35	3708.51	3177.56	3959.75	3652.88
13	3873.59	1527.68	2469.78	1236.56	1281.6	1807.67	1552.15	2247.94	3371.87		7309.17	16290	7576.96	7318.98	5707.26	8446.57	5606.47				10135.8	4772.81	4029.71	7396.43	4650.72	5113.14					7300.2	3729.76	8519.37	6388.72	10759.7	6390					2906.06	1573.86	2730.27	3051.86	3425.87	3246.65
14	3381.55	1280.17	2085.3	1122.03	1148.64	1542.7	1315.43	1981.63	3047.81		7402.24	16715.4	7012.47	6904.57	5325.38	7385.08	5362.16				8271.56	4080.15	3227.46	6299.08	4340.55	4775.22					6593.83	3391.11	7578.58	6125.62	9786.53	6001.72					2421.57	1444.04	2084.6	2801.53	3000.45	2746.57
15	3019.49	1105.61	1795.18	995.337	1000.12	1300.87	1162.9	1760.95	2642.47		7490.48	16997.8	6607.3	6637.77	4667.49	6841.81	4739.67				6438.33	3538.42	2620.45	5245.64	3864.87	4254.51					5803.08	3013.23	6969.51	5680.82	8491.38	5388.85					2035.79	1330.94	1511.86	2337.72	2566.21	2332.97
16	2592.9	951.812	1515.7	854.3	876.895	1120.4	1018.93	1551.64	2281.16		7385.4	16164.6	6043.46	6400.9	4184.26	6773.14	3916.16				5388.5	3065.73	2255.42	4332.74	3365.06	3648.72					4952.46	2659.86	6167.38	5204.33	7440.21	4767.94					1717.52	1208.5	2014.88	1864.02	2145.24	1978.11
17	2217.66	801.531	1299.52	734.072	752.708	960.985	901.366	1347.19	1990.96		7115.79	13923	5445.07	5934.99	3722.77	6701.51	3128.26				4560.2	2780.79	2010.82	3729.63	2888.46	3036.08					4142.53	2255.19	5221.06	4481.68	6561.12	4042.42					1501.56	1094.21	1864.72	1555.55	1829.13	1662.94
18	1904.05	709.52	1122.89	627.059	635.853	792.642	791.841	1161.79	1707.06		6749.99	11784.9	4860.87	5406.97	3349.79	6464.86	2611.35				4159.36	2490.2	1807.22	3298.82	2531.86	2630.05					3472.17	1939.44	4408.73	3655.83	5747.31	3455.69					1295.91	987.547	1535.36	1316.72	1601.87	1419.84
19	1688.25	629.77	981.637	541.664	547.869	690.221	684.121	1006.32	1487.08		5861.16	10117.5	4229.76	4830.41	3038.29	5994.36	2286.91				3912.87	2211.64	1611.86	2838.48	2250.51	2224.23					2932.37	1667.84	3678.01	2987.27	4931.42	3006.15					1134.55	878.96	1056.6	1152.46	1427.32	1234.75
20	1492.01	551.035	876.008	481.151	469.343	609.612	593.559	884.45	1317.4		4800.82	8665.75	3721.79	4141.84	2712.64	5385.7	2022.8				3333.39	1992.36	1399.88	2517.74	1997.81	1923.82					2561.8	1418.03	3115.85	2456.36	4316.83	2533.28					1013.59	784.497	1664.26	1054.58	1252.07	1089.44
21	1354.33	494.094	765.959	434.553	422.085	534.918	527.229	775.675	1177.34		3835.35	7341.64	3294.95	3551.41	2358.87	4748.63	1774.37				2741.57	1778.64	1227.36	2187.52	1776.77	1649.7					2265.05	1229.45	2664.08	2082.75	3716.17	2245.19					906.38	724.592	1416.77	939.236	1126.09	975.684
22	1234.27	447.8	684.155	391.775	391.338	480.285	485.734	694.295	1043.75		3141.21	6435.81	2895.65	3012.19	2033.63	4189.15	1579.07				2461.75	1611.68	1124.36	1912.08	1606.18	1431.62					1986.71	1106	2304.51	1757.77	3282.75	2020.95					807.362	650.054	1222.49	851.295	1034.63	888.537
23	1131.26	415.333	620.613	359.64	361.943	442.09	438.907	624.743	950.157		2678.19	5735.81	2568.91	2566.72	1758.04	3783.19	1413.63				2294.2	1484.43	1041.63	1723.36	1451.05	1285.11					1803.55	965.846	2065.16	1508.33	2909.94	1819.76					717.421	586.915	1047.87	737.047	958.157	810.294
24	1035.69	377.12	569.458	337.195	334.442	405.475	398.781	576.434	873.318		2393.27	5174.94	2270.05	2240.83	1587.98	3352.05	1278.19				2158.13	1354.92	939.637	1517.82	1324.44	1173.75					1625.17	863.949	1839.93	1339.45	2650.53	1628.29					651.073	537.338	913.865	660.567	874.959	748.526
25	927.893	346.282	521.311	310.463	303.359	371.469	369.725	529.109	806.588		2167.91	4711.3	2005.84	2000.15	1455.14	2979.16	1183.44				2020.95	1223	848.269	1311.63	1203.87	1056.71					1458.94	781.659	1634.24	1205.19	2395.52	1501.12					599.745	492.485	807.87	590.927	795.384	706.657
26	871.665	319.095	479	292.473	283.865	335.778	345.275	483.373	750.992		1969.8	4401.21	1792.36	1795.19	1340.65	2589	1086.75				1763.22	1125.73	760.332	1200.43	1098.6	967.501					1342.8	704.773	1433.89	1084.69	2152.21	1360.68					549.18	466.327	727.79	522.96	736.716	669.806
27	811.728	301.85	446.834	277.162	268.208	314.755	322.367	447.632	700.056		1799.68	4033.37	1601.96	1598.07	1231.25	2318.79	999.111				1499.66	1043.9	693.609	1076.09	1007.6	891.354					1240.02	642.426	1303.71	999.699	1959.27	1241.76					498.065	437.798	653.707	475.045	707.126	636.026
28	756.869	283.882	417.291	261.828	254.383	303.844	296.846	415.431	649.803		1683.58	3767.1	1441.52	1448.78	1099.66	2083.17	921.053				1333.84	957.059	632.178	974.359	932.466	824.126					1126.69	596.434	1182.85	928.96	1796.43	1113.55					459.084	412.559	598.274	436.707	662.069	597.577
29	718.155	265.918	395.598	246.882	233.829	280.06	277.901	382.451	608.466		1561.44	3565.1	1305.32	1308.96	996.555	1859.06	854.835				1287.22	879.32	569.141	898.545	847.038	763.527					1044.37	552.98	1087.42	865.159	1668.77	1031.84					428.065	402.407	565.758	405.479	617.472	564.184
30	671.177	249.659	371.764	238.697	214.312	262.974	263.906	355.773	570.446		1472.2	3321.23	1185.63	1219.03	909.363	1653.47	799.455				1205.54	828.5	530.472	800.972	786.397	709.858					960.711	508.799	1008.06	808.683	1542.76	963.365					396.245	408.112	516.621	366.068	581.136	535.283
31	629.935	233.85	347.365	224.632	201.421	253.991	252.284	338.164	541.68		1362.22	3007.5	1061.49	1124.31	844.386	1487.04	739.502				1093.76	762.766	492.483	722.573	720.207	662.248					913.416	466.483	940.58	761.447	1419.01	881.797					367.984	419.574	485.301	336.719	548.819	503.973
32	595.946	222.23	328.904	211.771	191.21	244.795	238.993	317.232	510.858		1281.88	2787.41	961.152	1020.56	777.293	1371.02	686.117				1002.81	709.744	447.826	663.184	648.369	620.804					839.126	431.94	853.728	720.549	1312	835.834					346.771	440.534	451.342	312.757	516.793	469.974
33	555.483	212.485	312.477	201.9	178.322	230.919	228.361	295.364	481.707		1213.14	2629.08	879.702	944.988	726.922	1268.25	633.172				910.886	664.143	412.676	611.528	596.786	579.527					756.911	399.659	792.042	672.952	1229.14	791.348					323.416	446.835	411.917	291.691	489.906	444.451
34	525.337	201.663	297.312	196.577	165.744	214.667	217.938	280.225	451.71		1138.31	2388.39	803.83	866.812	682.629	1158.03	592.298				831.708	623.243	378.088	561.533	552.208	536.365					726.491	374.178	739.381	629.318	1135.43	743.126					298.318	432.467	380.508	269.422	455.193	415.949
35	500.564	189.193	280.734	187.081	156.971	205.583	206.094	269.749	429.248		1054.51	2180.7	731.248	796.309	626.74	1066.82	555.126				784.45	576.926	347.076	521.775	500.62	503.078					671.945	350.16	689.822	588.424	1045.73	687.412					276.437	434.789	358.291	247.862	429.172	391.493
36	467.942	179.933	262.018	176.924	145.905	199.741	194.818	255.51	406.088		991.393	2018.84	671.516	738.345	564.049	984.195	515.265				737.707	544.643	318.98	479.793	459.12	475.919					625.775	323.47	646.96	552.725	969.368	636.102					255.079	400.619	340.808	236.598	407.447	367.273
37	437.663	170.259	245.879	168.955	136.331	185.387	183.718	241.851	381.811		926.32	1862.41	617.741	672.561	518.451	920.502	486.298				709.372	501.909	297.694	435.895	424.967	443.43					592.923	301.257	606.229	514.531	898.278	602.098					237.902	331.058	322.047	218.414	388.005	350.178
38	416.988	161.366	235.838	161.626	128.45	172.105	173.215	229.155	359.347		847.236	1710.67	572.933	625.287	478.802	850.475	453.198				660.69	468.472	278.14	401.427	390.793	414.413					551.434	281.683	574.241	482.52	844.181	566.711					228.519	279.33	303.588	202.062	368.296	334.786
39	398.697	154.496	226.664	154.848	123.768	166.265	163.614	214.774	339.44		759.745	1552.64	521.969	578.867	447.799	779.804	427.636				610.009	442.136	259.566	375.506	361.29	391.383					510.369	261.513	532.001	456.114	789.351	542.272					215.146	257.443	298.918	193.243	348.489	313.006
40	374.517	146.937	214.374	147.578	121.943	157.775	155.323	202.964	325.209		701.411	1453.11	479.626	531.907	414.993	725.027	411.224				558.713	413.902	237.945	349.746	331.671	372.729					484.104	244.123	498.472	433.229	739.374	517.891					199.373	239.978	288.828	182.644	327.462	294.068
41	352.063	139.033	202.605	143.053	115.394	149.356	148.06	191.662	310.42		648.289	1341.86	439.58	493.545	385.986	674.791	387.568				528.007	387.746	222.776	330.809	306.328	354.813					460.133	225.964	468.657	406.591	691.692	480.243					182.777	215.63	278.698	172.789	313.4	278.33
42	333.227	133.452	190.475	134.615	104.681	141.577	141.613	179.805	293.553		595.332	1251.07	408.642	458.207	364.93	622.006	365.276				493.313	360.903	210.532	303.373	286.232	335.381					439.058	213.871	443.171	378.006	648.793	447.205					171.681	205.371	265.761	163.279	295.397	266.916
43	316.976	126.681	181.959	126.799	100.455	134.508	131.931	172.593	279.767		543.86	1145.47	381.03	421.612	333.295	572.541	343.791				453.8	343.028	195.7	281.301	265.706	316.523					413.762	199.003	413.901	355.179	611.372	420.828					162.006	193.017	252.689	149.685	275.828	250.715
44	299.677	119.76	170.673	121.473	97.5109	124.467	124.557	161.32	265.837		495.571	1044.69	352.822	386.809	304.594	526.43	324.776				413.593	322.647	181.019	261.544	248.551	301.985					386.325	185.31	383.702	334.836	574.206	402.308					150.285	169.159	243.695	135.688	262.952	235.17
45	282.898	114.349	160.124	115.152	92.3209	116.368	117.148	152.196	252.987		451.501	964.462	325.638	360.777	285.058	481.781	307.992				382.748	299.719	168.387	246.332	233.888	284.649					361.677	172.596	358.136	313.156	533.228	379.127					139.196	155.432	230.306	126.649	246.193	222.45
46	270.133	109.384	151.837	108.237	83.6216	104.779	109.471	144.005	237.664		426.593	881.035	307.552	336.682	262.981	444.972	292.809				354.021	278.844	157.311	228.802	220.011	267.653					341.472	161.026	334.089	292.338	503.099	354.064					129.475	143.356	220.467	116.93	235.042	214.758
47	254.688	103.94	143.605	102.002	80.2074	96.9419	101.532	136.033	222.319		385.976	809.373	289.463	311.363	246.946	409.028	279.084				323.033	259.368	145.556	209.489	206.982	259.313					313.784	148.691	311.293	273.599	473.716	337.086					120.929	128.567	208.293	107.699	225.754	200.611
48	240.581	98.5634	135.786	94.784	76.7693	90.7976	95.5233	128.286	210.174		360.835	762.667	264.923	287.15	231.961	376.734	265.842				299.915	239.717	135.669	194.972	194.387	245.618					296.109	138.572	289.831	256.402	441.665	317.823					113.372	117.553	196.755	100.62	213.993	186.842
49	230.519	94.4834	128.029	90.2707	69.9916	81.3945	89.0024	122.841	200.042		338.939	706.397	244.75	266.159	214.692	348.489	253.104				280.032	222.377	128.149	181.183	182.283	230.358					281.073	131.049	267.879	240.906	414.789	296.118					104.555	106.828	183.903	93.8567	198.763	175.336
50	218.133	90.1551	119.476	85.3843	65.335	76.8137	83.0318	113.812	189.841		315.066	652.002	231.428	245.326	201.425	321.964	238.165				255.864	205.921	118.635	168.202	170.332	216.794					261.313	123.686	248.604	224.864	390.056	275.889					98.1331	96.2562	169.147	85.9053	186.067	163.529
51	205.855	86.0787	112.109	78.9853	62.8507	70.6892	76.8503	107.314	178.294		295.359	604.953	215.173	228.023	187.48	298.461	223.885				236.164	193.015	111.32	156.434	159.093	206.332					245.076	114.488	230.26	207.688	363.156	252.426					92.3877	89.7312	153.765	78.6024	174.162	150.674
52	191.185	81.932	104.881	74.667	57.5986	64.0731	71.7362	99.8072	165.346		267.136	552.86	198.09	212.211	176.299	275.687	212.826				222.146	176.488	103.899	145.605	150.932	197.394					229.628	106.291	211.667	193.81	336.776	234.696					85.0467	80.2091	142.723	72.8071	159.804	141.788
53	179.693	76.4839	98.3345	69.8968	53.4581	59.7921	66.8185	93.0767	154.571		247.489	507.461	185.008	195.982	164.28	255.129	199.131				204.496	163.591	95.5463	135.252	142.675	180.65					217.521	99.6143	195.121	181.045	319.035	216.596					79.6708	71.7251	132.571	68.8364	149.246	129.885
54	172.92	72.8454	93.6226	65.564	51.645	56.0601	62.3265	88.0123	142.965		234.023	473.248	172.93	182.374	153.515	236.684	184.333				189.585	152.28	89.7474	125.428	133.077	165.921					202.09	93.1567	181.127	168.754	300.043	204.871					74.6822	66.0186	119.259	62.9953	138.386	121.588
55	161.016	68.677	87.38	60.5632	48.3069	51.5086	58.4706	81.9799	134.538		218.553	449.004	160.7	171.049	143.239	221.002	173.55				177.386	140.491	83.9636	115.398	125.001	154.424					191.286	87.1883	169.338	158.139	281.532	190.053					69.2792	60.8296	107.712	58.2946	130.646	112.516
56	150.137	64.4263	80.7068	56.8049	43.3713	47.1034	55.0682	75.402	126.845		201.402	414.014	150.389	158.572	131.751	203.284	162.972				164.283	129.823	77.7549	107.792	116.613	143.272					179.777	81.7892	155.722	147.259	263.224	176.843					64.9806	56.2868	99.9831	54.7851	120.578	103.983
57	140.944	60.4511	75.6047	53.2782	39.3938	43.8825	51.7373	70.259	117.367		188.294	372.889	141.827	146.685	121.952	188.145	152.21				151.717	120.477	72.8072	99.9313	109.528	132.472					164.928	76.1381	142.606	135.857	243.608	167.457					61.0097	51.6779	90.5555	51.5215	111.982	96.0534
58	130.017	55.5604	70.3944	49.52	37.342	41.5036	48.0371	66.6805	109.649		173.213	344.609	131.027	137.258	113.469	174.149	141.917				142.023	112.003	67.5977	93.2682	102.964	123.837					152.812	70.3146	131.962	123.787	224.179	151.659					57.0881	46.6709	82.4736	47.6907	102.9	87.5249
59	120.701	51.227	65.9259	46.7089	34.8632	38.0846	44.3546	63.2287	101.591		160.521	318.816	122.376	127.445	105.702	160.22	131.516				132.091	104.281	62.1593	86.6012	95.7371	113.368					143.743	65.6518	122.349	114.154	210.346	138.611					52.5462	43.3629	76.9968	44.1361	95.1917	81.7523
60	111.458	47.9209	61.4274	43.6938	31.737	35.4757	41.3869	59.0382	93.6942		148.015	298.493	113.476	117.521	97.2015	148.801	122.137				120.587	95.5971	58.3763	80.0218	88.4696	104.668					132.678	61.2803	110.888	105.836	196.758	124.725					49.4824	40.5849	69.9597	41.6207	87.6451	75.7814
